# Supplementary material for: Ultrasensitive non-enzymatic electrochemical detection of paraoxon-ethyl in fruit samples using 2D Ti3C2Tx/MWCNT-OH
Source: Royal Society of Chemistry journal article supplement (doi:10.1039/d4nr04060k), 2025-01-01
Supplement: d4nr04060k1.pdf [file d4nr04060k1.pdf]

# Ultrasensitive non-enzymatic electrochemical detection of paraoxon-ethyl in fruit samples using a 2D $\text{Ti}_3\text{C}_2\text{T}_x/\text{MWCNT-OH}$

Asmi Aris<sup>1,2</sup>, Wulan Tri Wahyuni<sup>3,4</sup>, Budi Riza Putra<sup>4,5</sup>, Angga Hermawan<sup>6</sup>, Ferry Anggoro Ardy Nugroho<sup>7</sup>, Zhi Wei Seh\*<sup>8</sup>, Munawar Khalil\*<sup>1,2</sup>

<sup>1</sup>Department of Chemistry, Faculty of Mathematics and Natural Sciences, Universitas Indonesia, 16424 Depok, West Java, Indonesia.

<sup>2</sup>Low Dimension Materials Lab., Department of Chemistry, Faculty of Mathematics and Natural Sciences, Universitas Indonesia, 16424 Depok, West Java, Indonesia.

<sup>3</sup>Department of Chemistry, Faculty of Mathematics and Natural Sciences, IPB University, 16680 Bogor, Indonesia.

<sup>4</sup>Tropical Biopharma Research Center, IPB University, 16680 Bogor, Indonesia.

<sup>5</sup>Research Center for Metallurgy, National Research and Innovation Agency (BRIN), South Tangerang, Banten 15315, Indonesia.

<sup>6</sup>Research Center for Nanotechnology System, National Research and Innovation Agency (BRIN), South Tangerang, Banten 15314, Indonesia.

<sup>7</sup>Department of Physics, Faculty of Mathematics and Natural Sciences, Universitas Indonesia, 16424 Depok, West Java, Indonesia.

<sup>8</sup>Institute of Materials Research and Engineering (IMRE), Agency for Science, Technology and Research (A\*STAR), Singapore 138634, Republic of Singapore.

\*Corresponding authors:

sehzw@imre.a-star.edu.sg (Z.W. Seh)

mkhalil@sci.ui.ac.id (M. Khalil)

## Electronic Supporting Information

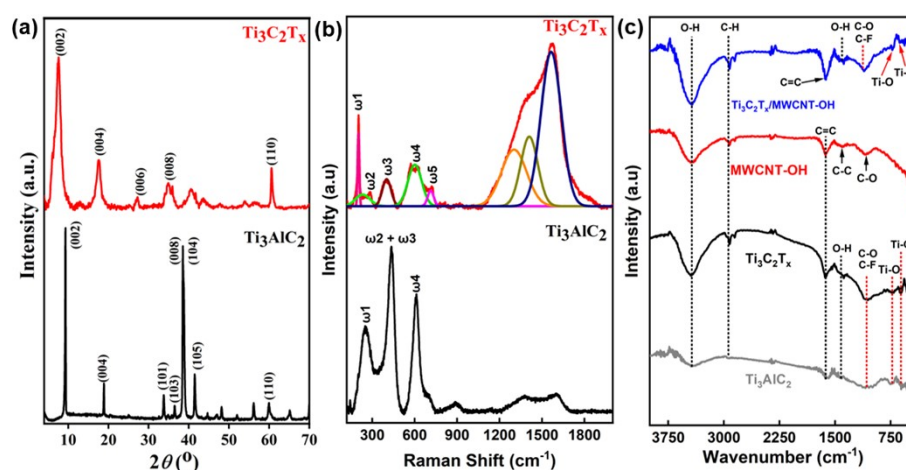

**Figure S1.** (a) FTIR Spectra of  $\text{Ti}_3\text{AlC}_2$ ,  $\text{Ti}_3\text{C}_2\text{T}_x$ , MWCNT-OH, and  $\text{Ti}_3\text{C}_2\text{T}_x/\text{MWCNT-OH}$ , (b) XRD Spectra of  $\text{Ti}_3\text{C}_2\text{T}_x$ , and  $\text{Ti}_3\text{AlC}_2$ , (c) Raman Spectra of  $\text{Ti}_3\text{AlC}_2$ , and  $\text{Ti}_3\text{C}_2\text{T}_x$ .

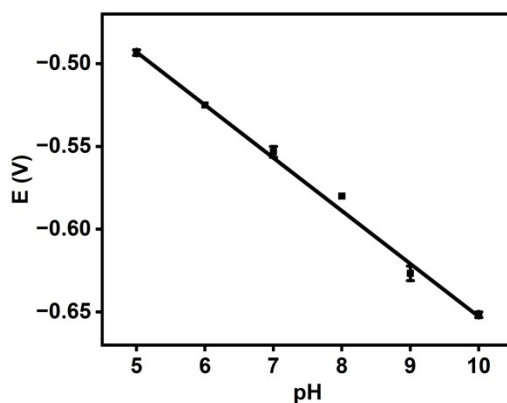

**Figure S2.** The linear relationship between the reduction potential of ethyl paraoxon and pH variations.

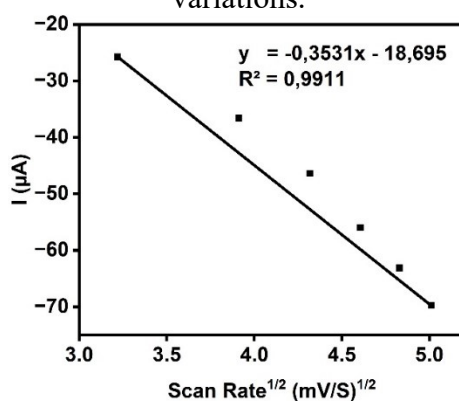

**Figure S3.** The linear correlation between the reduction current of ethyl paraoxon and the scan rate indicates a diffusion-controlled electrochemical process.

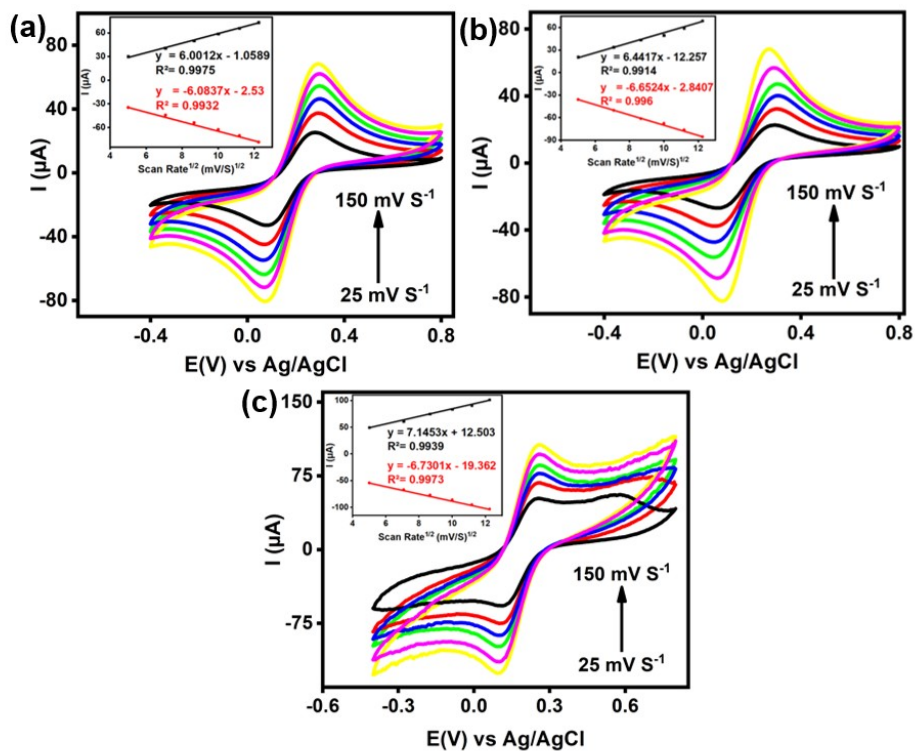

**Figure S4.** Cyclic voltammogram (insets: curve plot of scan rate analysis) of 1 mM  $K_3[Fe(CN)_6]$  in 0.1 M pH 8 phosphate buffer measured with (a) bare GCE, (b)  $Ti_3C_2T_x$ /GCE-modified GCE, and (c)  $Ti_3C_2T_x$ /MWCNT-OH modified GCE

**Equation S1.** Cottrell equation

$$I(t) = \frac{nFAD^{1/2}C}{\pi^{1/2}t^{1/2}}$$

The relationship between  $I(t)$  and  $t^{1/2}$  :

$$\frac{I(t)}{t^{1/2}} = \frac{nFAD^{1/2}C}{\pi^{1/2}}$$

Thus, the diffusion coefficient ( $D$ ) is :

$$D^{1/2} = \frac{\frac{I}{t^{1/2}}\pi^{1/2}}{nFAC}$$

$\frac{I(t)}{t^{1/2}}$  where  $t^{1/2}$  is derived based on the slope value ( $0.3191 \times 10^{-7} \mu\text{A s}^{1/2}$ ),  $n$  denotes the total number of electrons participating in the reaction,  $D$  represents the diffusion coefficient ( $\text{cm}^2/\text{s}$ ),  $F$  is Faraday's constant,  $A$  is the electrode area ( $0.31\text{cm}^2$ , obtained through cyclic voltammetry as shown in Fig. S4, ESI),  $C$  denotes the concentration ( $\text{mol}/\text{cm}^3$ ), and is assigned a value of 3.14.

$$D^{1/2} = \frac{0.3191 \mu\text{A s}^{1/2} \times 3.14^{1/2}}{4 \times 96500 \text{ C/mol} \times 0.31 \text{ cm}^2 \times 0.0000001 \text{ mol}/\text{cm}^3}$$

$$D^{1/2} = \frac{(3.191 \times 10^{-7} \text{ A s}^{1/2}) \times 3.14^{1/2}}{4 \times 96500 \text{ C/mol} \times 0.31 \text{ cm}^2 \times 0.0000001 \text{ mol}/\text{cm}^3}$$

$$D^{1/2} = \frac{5.656 \times 10^{-7} \text{ A.s}^{1/2}}{0.011926 \text{ C/cm}}$$

$$D^{1/2} = \frac{5.656 \times 10^{-7} \text{ A.s}^{1/2}}{0.011926 \text{ A.s/cm}}$$

$$D = (5.656 \times 10^{-5})^2 \text{ cm}^2/\text{s}$$

$$D = 3.19 \times 10^{-9} \text{ cm}^2/\text{s}$$
